# Supplementary material
Source: Springer Nature journal article supplement (https://www.springermedizin.de/resource/supplementary/12880_2013_214_MOESM6_ESM.pdf/9450316)

**a. Original RGB Images**

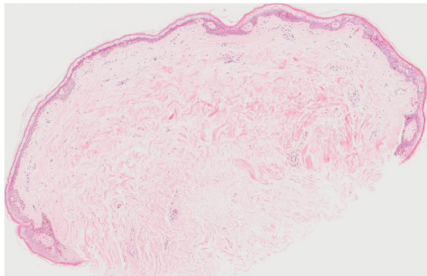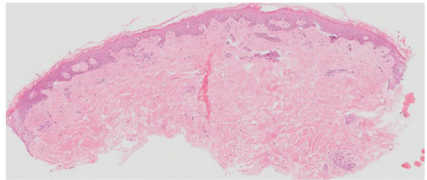

**b. Colour Normalised Images**

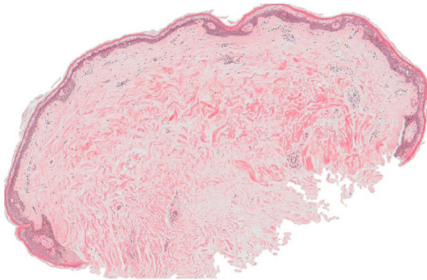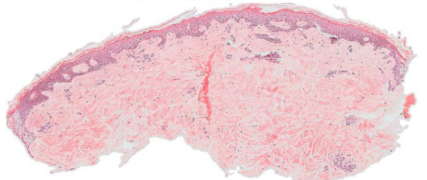

Supplement: MOESM6 [file 9450316]
